## Correction: Epithelial-mesenchymal crosstalk induces radioresistance in HNSCC cells

**Teresa Bernadette Steinbichler<sup>1</sup>, Alshaimaa Abdelmoez<sup>2</sup>, Veronika Maria Metzler<sup>1</sup>, Daniel Dejaco<sup>1</sup>, Herbert Riechelmann<sup>1</sup>, Jozef Dudas<sup>1</sup> and Ira-Ida Skvortsova<sup>2</sup>**

<sup>1</sup>Department of Otorhinolaryngology, Medical University of Innsbruck, Innsbruck, Austria

<sup>2</sup>Department of Therapeutic Radiology and Oncology, Medical University of Innsbruck, Innsbruck, Austria

**Published:** October 08, 2019

**Copyright:** Steinbichler et al. This is an open-access article distributed under the terms of the Creative Commons Attribution License 3.0 (CC BY 3.0), which permits unrestricted use, distribution, and reproduction in any medium, provided the original author and source are credited.

**This article has been corrected:** The author names below were unintentionally reversed in the listing. The correct author names are as follows:

Alshaimaa Abdelmoez

Veronika Maria Metzler

Daniel Dejaco

Herbert Riechelmann

Jozef Dudas

Ira-Ida Skvortsova

Original article: Oncotarget. 2018; 9:3641–3652. <https://doi.org/10.18632/oncotarget.23248>
